# Supplementary material
Source: publisher site journal article supplement (https://www.dovepress.com/article/392500)
Supplement: Supplementary file 1 [file get_supplementary_file.php]

**Supplementary**

**Computational systems pharmacology and molecular docking reveal an anti-apoptosis and anti-inflammatory mechanism of compound Angelica Ligusticum wallichii granules in the treatment of endometriosis**

**Yueyan Li, Jialei Zhu, Jing Tang, ***

Department of Pharmacy, Obstetrics and Gynecology Hospital of Fudan University, Shanghai, People’s Republic of China

*** Correspondence:**

Dr. Jing Tang, Department of Pharmacy, Obstetrics and Gynecology Hospital of Fudan University, Shanghai, China.

Email: 1817@fckyy.org.cn

Tel: +86 21 33180593

Fax: +86 21 33180593

**Contents**

**Figure S1. Characteristics of CALG**

**Table S1. Summary of main components identified in CALG**

**Table S2. Predicted targets of components detected**

**Table S3. Predicted targets of endometriosis**

**Table S4. The core targets of CALG in the treatment of endometriosis**

**Table S5. Top 15 of metabolic pathways**

**
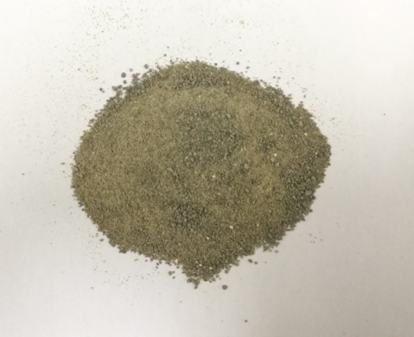
**

**Figure S1. Characteristics of CALG**

**Table S1. Summary of main components identified in CALG**

| No | Time/min | | Adduct ions | m/z Value | Theoretical value of M / Z | ppm | Molecular formula | Molecular weight | Name | MS/MS | Attribution |
| --- | --- | --- | --- | --- | --- | --- | --- | --- | --- | --- | --- |
| 1 | | 1.337 | [M-H]- | 341.109 | 341.1089 | 0.2 | C12H22O11 | 342.30 | sucrose | 341.1092;179.0563;161.0461;143.0352;131.0348; 119.0348;101.0239;89.0239;71.0136;59.0136 | All |
| 2 | | 1.597 | [M-H]- | 665.2175 | 665.2146 | 4.4 | C24H42O21 | 666.58 | Maltotetraose | 665.2234;485.1539;443.1456;383.1224;341.1113; 281.0891;221.0680;179.0575;161.0467;143.0359 | Radix salviae miltiorrhizae, Angelica sinensis, radix astragali, radix paeoniae rubra, rhizoma chuanxiong, Rhizoma cyperi, Rhizoma Cynanchi Husso, Rhizoma gleditsiae, Rhizoma Cynanchi paniculati, Rhizoma Cynanchi, Radix cynanchi, eupolyphaga sinensis, scalded leech, Semen Persicae |
| 3 | | 1.863 | [M-H]- | 827.2707 | 827.2674 | 4 | C30H52O26 | 828.72 | Verbascose | 827.2666;707.2246;665.2132;587.1830;545.1730; 425.1303;383.1185;341.1080;281.0873;179.0558; 161.0451;143.0342 | Radix salviae miltiorrhizae, Angelica sinensis, Radix Astragali, radix paeoniae rubra, chuanxiong, vinegar Cyperus, vinegar Corydalis, Gleditsia sinensis, Cynanchum paniculata, woodlouse worm, hot leech and peach seed |
| 4 | | 2.049 | [M-H]- | 827.2699 | 827.2674 | 3 | C30H52O26 | 828.72 | maltopentaose | 827.2757;707.2259;665.2216;587.1852;545.1748; 425.1303;383.1200;341.1099;281.0875;221.0675; 179.0569;161.0464;143.0361;101.0257 | Radix salviae miltiorrhizae, Angelica sinensis, Radix Astragali, radix paeoniae rubra, chuanxiong, vinegar Cyperus, vinegar Corydalis, Gleditsia sinensis, Cynanchum paniculata, woodlouse worm, hot leech and peach seed |
| 5 | | 2.396 | [M-H]- | 989.3271 | 989.3202 | 6.9 | C36H62O31 | 990.86 | Maltohexaose | 989.3300;869.2751;827.2758;749.2496;707.2291; 665.2217;587.1880;545.1761;503.1645;425.1319; 341.1105;281.0885;221.0681;179.0569;161.0463 | Radix salviae miltiorrhizae, Angelica sinensis, Radix Astragali, radix paeoniae rubra, chuanxiong, vinegar Cyperus, vinegar Corydalis, Gleditsia sinensis, Cynanchum paniculata, woodlouse worm, hot leech and peach seed |
| 6 | | 2.58 | [M-H]- | 191.0182 | 191.0197 | 5.6 | C6H8O7 | 192.12 | Citric acid | 191.0176;129.0181;111.0087.87.0086;67.0187 | All |
| 7 | | 2.75 | [M-H]- | 167.0219 | 167.0211 | 5 | C5H4N4O3 | 168.11 | Uric acid | 167.0225;124.0165;97.0054;96.0215;69.0102 | All |
| 8 | | 3.006 | [M-H]- | 1151.3819 | 1151.3731 | 7.7 | C42H72O36 | 1153.00 | Maltoheptaose | 1151.3780;989.3258;911.2938;869.2847;827.2721; 749.2384;707.2304;665.2174;587.1823;503.1639; 443.1403;341.1095;281.0871;179.0572;161.0461 | Radix salviae miltiorrhizae, Angelica sinensis, Radix Astragali, radix paeoniae rubra, chuanxiong, vinegar Cyperus, vinegar Corydalis, Gleditsia sinensis, Cynanchum paniculata, woodlouse worm, hot leech and peach seed |
| 9 | | 3.727 | [M-H]- | 151.027 | 151.0261 | 5.6 | C5H4N4O2 | 152.03 | Xanthine | 151.0266;108.0198;80.0266;65.9988 | Woodlouse insect, vinegar Corydalis |
| 10 | | 4.01 | [M-H]- | 375.1306 | 375.1297 | 1.9 | C16H24O10 | 376.36 | 8-Debenzoylpaeoniflorin | 345.1178;195.0684;177.0568;165.0678;123.0440; 71.0162 | Red peony |
| 11 | | 4.433 | [M-H]- | 243.0626 | 243.0623 | 1.4 | C9H12N2O6 | 244.20 | Uridine | 243.0593;200.0581;152.0354;122.0245;110.0252; 82.0305;66.0353 | All |
| 12 | | 5.833 | [M-H]- | 375.13 | 375.1297 | 0.9 | C16H24O10 | 376.36 | Debenzoylalbiflorin | 375.1279;345.1192;183.0653;139.0787;121.0654; 61.9892 | Red peony |
| 13 | | 6.163 | [M-H]- | 169.0152 | 169.0142 | 5.6 | C7H6O5 | 170.12 | Gallic acid | 169.0137;125.0239;97.0295;79.0186;69.0343; 53.0389 | Red peony |
| 14 | | 9.193 | [M+H]+ | 268.1039 | 268.104 | -0.5 | C10H13N5O4 | 267.24 | Adenosine | 268.1028;136.0620;119.0354;94.0393 | All |
| 15 | | 11.653 | [M+H]+ | 284.0986 | 284.0989 | -1.2 | C10H13N5O5 | 283.24 | Guanosine | 152.0567;135.0300;110.0349 | Radix salviae miltiorrhizae, Angelica sinensis, Radix Astragali, radix paeoniae rubra, Ligusticum chuanxiong, vinegar Corydalis, Gleditsia sinensis, epimedium, Cynanchum paniculata, woodlouse worm, Chan Taoren |
| 16 | | 15.549 | [M-H]- | 197.0464 | 197.0455 | 4.3 | C9H10O5 | 198.17 | Danshensu | 179.0361;135.0458;123.0460;122.0373;117.0360; 73.9932 | Salvia miltiorrhiza |
| 17 | | 17.763 | [M-H]- | 493.1219 | 493.1199 | 4.1 | C19H26O15 | 494.40 | 1'-O-Galloylsucrose | 493.1184;331.0645;313.0552;283.0437;241.0333; 169.0136;125.0246 | Red peony |
| 18 | | 18.929 | [M-H]- | 493.1217 | 493.1199 | 3.7 | C19H26O15 | 494.40 | 6'-O-Galloylsucrose | 493.1220;331.0664;313.0566;271.0468;211.0262; 169.0149;125.0249 | Red peony |
| 19 | | 19.388 | [M-H]- | 137.0251 | 137.0244 | 5 | C7H6O3 | 138.12 | Protocatechuic aldehyde | 137.0252;119.0152;108.0231;92.0271;81.0364; 53.0397 | Salvia miltiorrhiza |
| 20 | | 19.428 | [M-H]- | 493.1205 | 493.1199 | 1.2 | C19H26O15 | 494.40 | 6-O-Galloylsucrose | 493.1233;313.0578;223.0249;169.0148;125.0251 | Red peony |
| 21 | | 19.807 | [M+HCOO]- | 520.1689 | 520.1672 | 3.3 | C20H29NO12 | 475.44 | Amygdalin derivative | 474.1634;323.0982;312.1100;263.0768;221.0669; 161.0463;150.0568;101.0248 | Peach kernel |
| 22 | | 20.341 | [M+HCOO]- | 520.1699 | 520.1672 | 5.2 | C20H29NO12 | 475.44 | Amygdalin derivative | 474.1655;323.0990;312.1107;263.0780;221.0676; 179.0582;150.0570;101.0258 | Peach kernel |
| 23 | | 21.472 | [M-H]- | 475.1465 | 475.1457 | 1.7 | C20H28O13 | 476.43 | L-Amygdalinic acid | 475.1476;431.1580;269.1039;221.0650;161.0458; 143.0367;125.0259;113.0250;101.0256;85.0308; 71.0136;59.0145 | Peach kernel |
| 24 | | 21.846 | [M-H]- | 353.0887 | 353.0878 | 2.5 | C16H18O9 | 354.10 | neochlorogenic acid | 353.0869;191.0559;179.0353;135.0452 | Rhizoma ligustici wallichii |
| 25 | | 24.815 | [M-H]- | 475.1478 | 475.1457 | 4.4 | C20H28O13 | 476.43 | D-Amygdalinic acid | 475.1464;431.1577;269.1024;161.0457;101.0245; 113.0241;101.0245;71.0134 | Peach kernel |
| 26 | | 30.468 | [M-H]- | 179.0354 | 179.035 | 2.3 | C9H8O4 | 180.04 | caffeic acid | 179.0351;143.8649;135.0454;117.0370;89.0392 | Rhizoma ligustici wallichii |
| 27 | | 31.323 | [M+HCOO]- | 477.1635 | 477.1614 | 4.5 | C19H28O11 | 432.42 | Benzyl-β-gentiobioside | 431.1577;269.1034;161.0462;71.0141 | Peach kernel |
| 28 | | 31.869 | [M-H]- | 353.088 | 353.0878 | 0.5 | C16H18O9 | 354.10 | chlorogenic acid | 191.0562;85.0297 | Rhizoma ligustici wallichii |
| 29 | | 32.798 | [M+HCOO]- | 502.1593 | 502.1566 | 4.2 | C20H27NO11 | 457.43 | L-Amygdalin | 456.1513;323.0974;263.0772;221.0655;161,0454; 119.0352;89.0244 | Peach kernel |
| 30 | | 33.25 | [M+HCOO]- | 502.1577 | 502.1566 | 2.2 | C20H27NO11 | 457.43 | D-Amygdalin | 456.1524;323.0980;263.0774;221.0672;179.0563; 119.0350;89.0242 | Peach kernel |
| 31 | | 33.980 | [M+H]+ | 344.1858 | 344.1856 | 0.5 | C20H25NO4 | 343.42 | (+)-codamine | 344.1864;301.1445;299.1287;225.0903;206.1188 189.0913;151.0753;123.0438;58.0646 | Corydalis |
| 32 | | 34.311 | [M-H]- | 353.0889 | 353.0878 | 3.1 | C16H18O9 | 354.10 | cryptochlorogenic acid | 353.0891;191.0565;173.0468;155.0361;135.0455; 111.0458;93.0348;85.0301;69.0357 | Rhizoma ligustici wallichii |
| 33 | | 39.874 | [M-H]- | 479.1557 | 479.1559 | -0.4 | C23H28O11 | 480.46 | Albiflorin | 121.0283 | Red peony |
| 34 | | 42.197 | [M+H]+ | 342.171 | 342.17 | 3 | C20H23NO4 | 341.16 | tetrahydrocolumbamine | 342.1693;311.1269;297.1111;282.0882;265.0853; 267.0649;237.0907;222.0685;205.0656;191.0864; 165.0709;58.0647 | Corydalis |
| 35 | | 43.159 | [M-H]- | 479.1559 | 479.1559 | 5.2 | C23H28O11 | 480.46 | Paeoniflorin | 479.1629;327.1091;165.0557;121.0283;77.0423 | Red peony |
| 36 | | 45.593 | [M-H]- | 193.0515 | 193.0506 | 4.5 | C10H10O4 | 194.06 | E-Ferulic acid | 193.0438;178.0298;149.0623;134.0385 | Angelica, ligusticum |
| 37 | | 45.640 | [M+H]+ | 314.1761 | 314.1751 | 3.3 | C19H23NO3 | 313.17 | Armepavine | 314.1733;269.1156;237.0886;209.0952;145.0642; 137.0599;115.0537;107.0486;77.0379;58.0644 | Corydalis |
| 38 | | 47.299 | [M+H]+ | 328.1554 | 328.1543 | 3.2 | C19H21NO4 | 327.15 | isoboldine | 328.1565;178.0870;163.0627;151.0754 | Corydalis |
| 39 | | 48.911 | [M+HCOO]- | 525.1646 | 525.1614 | 6.2 | C23H28O11 | 480.46 | Mudanpioside I | 525.1576;479.1533;449.1450;327.1081;121.-292; 77.0397 | Red peony |
| 40 | | 49.95 | [M+HCOO]- | 491.1208 | 491.1195 | 2.6 | C22H22O10 | 446.40 | Calycosin-7-O-β-D-glucoside | 491.1237;283.0620;268.0379 | Astragalus |
| 41 | | 50.607 | [M+H]+ | 342.1703 | 342.17 | 0.9 | C20H23NO4 | 341.16 | alkaloid | 342.1717;178.0863;163.0623;151.0753 | Corydalis |
| 42 | | 50.899 | [M-H]- | 537.1076 | 537.1039 | 7.0 | C27H22O12 | 538.46 | Salvianolic acid H | 537.1087;493.1178;313.0727;295.0621;197.0461; 185.0250;159.0453;109.0297 | Salvia |
| 43 | | 51.081 | [M+H]+ | 356.185 | 356.1856 | -1.8 | C21H25NO4 | 355.18 | yuanhunine | 356.1869;340.1553;308.1285;192.1023;177.0784 148.0757 | Corydalis |
| 44 | | 51.351 | [M-H]- | 631.1692 | 631.1668 | 3.7 | C30H32O15 | 632.57 | Galloylpaeoniflorin | 631.1714;613.1591;509.1299;465.1402;399.0937; 313.0555;271.0452;211.0239;169.0137;125.0239 | Red peony |
| 45 | | 51.737 | [M-H]- | 537.1072 | 537.1039 | 6.2 | C27H22O12 | 538.46 | Lithospermic acid | 537.1040;493.1132;313.0714;295.0606;185.0247; 109.0299 | Salvia |
| 46 | | 51.861 | [M+H]+ | 356.1865 | 356.1856 | 2.4 | C21H25NO4 | 355.18 | glaucine | 356.1864;341.1624;192.1021;177.0783;148.0751 | Corydalis |
| 47 | | 52.219 | [M+H]+ | 354.1325 | 354.1336 | -3.1 | C20H19NO5 | 353.13 | protopine | 354.1348;336.1242;275.0711;247.0758;206.0824; 188.0711;165.0553;149.0601;119.0491 | Corydalis |
| 48 | | 52.832 | [M+Na]+ | 247.0945 | 247.0941 | 1.7 | C12H16O4 | 224.10 | Senkyunolide I | 174.1293;120.0800 | Ligusticum |
| 49 | | 53.326 | [M-H]- | 515.1237 | 515.1195 | 8.2 | C25H24O12 | 516.13 | isochlorogenic acid A | 515.1225;353.0889;335.0765;191.0557;179.0347; 173.0455;135.0453;93.0344 | Ligusticum |
| 50 | | 53.950 | [M-H]- | 515.1225 | 515.1195 | 5.8 | C25H24O12 | 516.13 | isochlorogenic acid B | 515.1237;353.0880;191.0572;179.0360 | Ligusticum |
| 51 | | 54.143 | [M-H]- | 417.0834 | 417.0827 | 1.6 | C20H18O10 | 418.35 | Salvianolic acid D | 417.0862;197.0472;175.0417;135.0464;72.9938 | Salvia |
| 52 | | 54.565 | [M-H]- | 631.1703 | 631.1668 | 5.5 | C30H32O15 | 632.57 | 4-O-galloylalbiflorin | 631.1702;469.1115;313.0561;169.0159;121.0290 | Red peony |
| 53 | | 54.575 | [M+H]+ | 370.1641 | 370.1649 | -2.2 | C21H23NO5 | 369.16 | α-allocryptopine | 370.1660;352.1546;290.0956;206.0814;188.0708; 181.0872;130.0675 | Corydalis |
| 54 | | 54.967 | [M+HCOO]- | 525.1643 | 525.1614 | 5.6 | C23H28O11 | 480.46 | Albiflorin R1 | 525.1630;479.1590;357.1207;327.1107;283.0821; 195.0656;121.0301;77.0393 | Red peony |
| 55 | | 55.073 | [M+Na]+ | 247.095 | 247.0941 | 3.7 | C12H16O4 | 224.10 | Senkyunolide H | 247.0972 | Ligusticum |
| 56 | | 55.152 | [M+H]+ | 356.1869 | 356.1856 | 3.6 | C21H25NO4 | 355.18 | tetrahydropalmatine | 356.1836;325.1420;310.1187;294.1240;279.1008 251.1059;236.0830;220.0884;191.0863 | Corydalis |
| 57 | | 55.165 | [M+H]+ | 328.1909 | 328.1907 | 0.5 | C20H25NO3 | 327.18 | leonticine | 328.1895;283.1311;251.1052;223.1110;208.0871 175.0746;143.0480;121.0635;115.0525;58.0639 | Corydalis |
| 58 | | 56.01 | [M+H]+ | 370.2014 | 370.2013 | 0.3 | C22H27NO4 | 369.19 | alkaloid | 370.2000;354.1703;322.1462;206.1180;190.0869 165.0909 | Corydalis |
| 59 | | 56.097 | [M-H]- | 237.0768 | 237.0768 | -0.2 | C12H14O5 | 238.08 | trimethoxycinnamic acid | 237.0746;193.0864;150.0315;136.0172;108.0212 | Ligusticum |
| 60 | | 56.188 | [M]+ | 320.0917 | 320.0917 | -0.4 | C19H14NO4 | 320.09 | coptisine | 320.0919;292.0963;262.0859;234.0912;204.0809 | Corydalis |
| 61 | | 56.264 | [M+HCOO]- | 507.1553 | 507.1508 | 8.9 | C23H26O10 | 462.45 | Lactiflorin | 507.1524;461.1464;339.1057;177.0568;161.0474;121.0299;77.0382 | Red peony |
| 62 | | 56.294 | [M]+ | 338.1384 | 338.1387 | -0.8 | C20H20NO4 | 338.14 | columbamin | 338.1399;322.1088;308.0924;294.1135;279.0901;265.0737;262.0863;250.0881;236.0710 | Corydalis |
| 63 | | 56.569 | [M-H]- | 515.1228 | 515.1195 | 6.4 | C25H24O12 | 516.13 | isochlorogenic acid C | 515.1268;353.0899;317.0652;191.0571;179.0354;173.0460;135.0459 | Ligusticum |
| 64 | | 56.597 | [M-H]- | 359.0783 | 359.0772 | 2.9 | C18H16O8 | 360.31 | Rosmarinic acid | 197.0451;179.0349;161.0241;133.0293;123.0450;72.9930 | Salvia |
| 65 | | 56.597 | [M-H]- | 717.1498 | 717.1461 | 5.1 | C36H30O16 | 718.61 | Salvianolic acid E | 717.1508;519.0953;339.0524;321.0417;295.0618;279.0344;185.0258 | Salvia |
| 66 | | 57.560 | [M+H]+ | 340.1541 | 340.1543 | -0.7 | C20H21NO4 | 339.15 | canadine | 340.1560;176.0709;119.0489 | Corydalis |
| 67 | | 58.306 | [M+HCOO]- | 475.1253 | 475.1246 | 1.5 | C22H22O9 | 430.4047 | Ononin | 370.2018;354.1705;204.1006;192.1017;165.0911;150.0679 | Corydalis |
| 68 | | 58.534 | [M+H]+ | 370.2011 | 370.2013 | 0.3 | C22H27NO4 | 369.19 | corydaline | 493.1228;313.0740;295.0641;197.0466;185.0259;159.0453;109.0301;72.9928 | Salvia |
| 69 | | 58.613 | [M-H]- | 493.1173 | 493.114 | 6.6 | C26H22O10 | 494.45 | Isomer of Salvianolic acid A | 823.2718;661.2170;514.1497;352.0944;323.0949 | Epimedium |
| 70 | | 59.421 | [M-H]- | 823.2718 | 823.2666 | 6.3 | C38H48O20 | 824.27 | Diphylloside A | 352.1574;337.1323;321.1014;308.1304;293.1062;276.1029;265.1108 | Corydalis |
| 71 | | 59.487 | [M]+ | 352.1544 | 352.1543 | 0.2 | C21H22NO4 | 352.15 | 13-methylpalmatrubine | 465.2175;303.1606;285.1527;241.1620;186.1070;161.0443;119.0363;113.0257.89.0250;59.0144 | Epimedium |
| 72 | | 60.036 | [M-H]- | 465.2139 | 465.213 | 1.9 | C24H34O9 | 466.22 | [4-(β-D-glucopyranosyloxy)-2,6-bis(3-methyl-2- buten-1-yl)phenyl](hydroxy)acetic acid | 352.1561;336.1244;321.1000;308.1295;293.1054;279.0895 | Corydalis |
| 73 | | 60.138 | [M]+ | 352.1552 | 352.1543 | 2.5 | C21H22NO4 | 352.15 | 13-methyldehydrocorydalmine | 807.2754;687.2177;645.2250;514.1570;352.1022 | Epimedium |
| 74 | | 61.457 | [M-H]- | 807.2707 | 807.2717 | 1.2 | C38H48O19 | 808.28 | Diphylloside B | 661.2171;541.1612;515.1658;499.1658;395.1185; 353.1038;298.0486 | Epimedium |
| 75 | | 61.457 | [M-H]- | 661.2177 | 661.2138 | 5.9 | C32H38O15 | 662.22 | Epimedoside A | 717.1522;519.0976;339.0525;321.0418;295.0622;279.0305;185.0249 | Salvia |
| 76 | | 62.375 | [M-H]- | 717.1496 | 717.1461 | 4.9 | C36H30O16 | 718.61 | Salvianolic acid B | 267.0664,252.0486 | Astragalus |
| 77 | | 62.897 | [M-H]- | 717.1494 | 717.1461 | 4.6 | C36H30O16 | 718.61 | Isomer of Salvianolic acid B | 717.1482;519.0945;339.0495;321.0410;295.0627;279.0302;185.0243 | Salvia |
| 78 | | 62.995 | [M]+ | 352.1545 | 352.1543 | 0.5 | C21H22NO4 | 352.15 | palmatine | 352.1564;336.1246;322.1091;320.0940;308.1292;294.1136;292.0979;278.0822 | Corydalis |
| 79 | | 63.125 | [M]+ | 336.1231 | 336.123 | 0.2 | C20H18NO4 | 336.12 | berberine | 336.1226;320.0928;306.0756;292.0964;278.0816;262.0874;234.0886 | Corydalis |
| 80 | | 64.839 | [M-H]- | 283.0613 | 283.0612 | 0.4 | C16H12O5 | 284.26 | Calycosin | 283.0608;268.0377;239.0350;211.0415;183.0451;148.0163;91.0205 | Astragalus |
| 81 | | 65.067 | [M-H]- | 717.1519 | 717.1461 | 8.1 | C36H30O16 | 718.61 | Salvianolic acid L | 717.1516;519.1008;493.1235;339.0533;321.0416;295.0599;279.0328;185.0258 | Salvia |
| 82 | | 66.897 | [M]+ | 366.1705 | 366.17 | 1.4 | C22H24NO4 | 366.17 | dehydrocorydaline | 366.1692;350.1377;334.1440;322.1432;308.1290; 292.0967 | Corydalis |
| 83 | | 67.363 | [M-H]- | 717.1504 | 717.1461 | 6 | C36H30O16 | 718.61 | Salvianolic acid Y | 717.1523;519.0983;339.0532;321.0418;295.0617; 185.0232 | Salvia |
| 84 | | 67.367 | [M-H]- | 493.1171 | 493.114 | 6.2 | C26H22O10 | 494.45 | Salvianolic acid A | 493.1174;313.0714;295.0611;203.0348;185.0242; 109.0292 | Salvia |
| 85 | | 69.062 | [M-H]- | 301.1082 | 301.1081 | 0.2 | C17H18O5 | 302.12 | 4,4'-Dihydroxy-2,6-dimethoxydihydrochalcone | 207.0653;165.0552;153.0558;150.0317;138.0318; 135.0451;93.0339 | Dragon's Blood |
| 86 | | 69.481 | [M+HCOO]- | 883.2941 | 883.2877 | 7.2 | C39H50O20 | 838.29 | hexandraside F | 675.2352;529.1764;367.1194;297.0491 | Epimedium |
| 87 | | 70.191 | [M+HCOO]- | 883.2899 | 883.2877 | 2.4 | C39H50O20 | 838.29 | Epimedin A | 837.2930;675.2338;513.1799;367.1204 | Epimedium |
| 88 | | 70.743 | [M+HCOO]- | 853.2819 | 853.2772 | 5.5 | C38H48O19 | 808.28 | Epimedin B | 807.2769;645.2225;409.1242;366.1099;323.0594 | Epimedium |
| 89 | | 71.016 | [M-H]- | 491.1001 | 491.0984 | 3.5 | C26H20O10 | 492.43 | Isosalvianolic acid C | 491.1023;311.0546;293.0481;267.0679;249.0595; 135.0463 | Salvia |
| 90 | | 71.318 | [M+HCOO]- | 867.2975 | 867.2928 | 5.4 | C39H50O19 | 822.29 | Epimedin C | 867.2939;659.2415;367.1230 | Epimedium |
| 91 | | 71.692 | [M+HCOO]- | 721.2431 | 721.2349 | 8.8 | C33H40O15 | 676.24 | Icarrin | 721.2398;529.1733;513.1792;409.1300;367.1195; | Epimedium |
| 92 | | 71.903 | [M+HCOO]- | 629.1909 | 629.1876 | 5.3 | C30H32O12 | 584.57 | Benzoylpaeoniflorin | 629.1953;583.1865;553.1749;431.1366;165.0562; 121.0302 | Red peony |
| 93 | | 72.589 | [M+HCOO]- | 629.1904 | 629.1876 | 4.5 | C30H32O12 | 584.57 | Benzoylalbiflorin | 629.1921;583.1841;553.1742;387.1128;121.0301 | Red peony |
| 94 | | 73.873 | [M+H]+ | 191.107 | 191.1067 | 1.8 | C12H14O2 | 190.10 | Z-Ligustilide | 191.1062;136.9294;118.9207;77.0379 | Rhizoma ligustici wallichii |
| 95 | | 73.951 | [M-H]- | 491.1 | 491.0984 | 3.3 | C26H20O10 | 492.43 | Salvianolic acid C | 491.1033;293.0475;265.0480;135.0470 | Salvia |
| 96 | | 74.228 | [M-H]- | 819.2754 | 819.2717 | 4.5 | C39H48O19 | 820.28 | Anhydroicaritin-3-O-rhamnoside(1-2)-furan acid-7-O-glucoside | 819.2772;657.2240;529.1769;409.1305;367.1219 | Epimedium |
| 97 | | 75.448 | [M-H]- | 661.2177 | 661.2138 | 5.9 | C32H38O15 | 662.22 | Icarisoside B、Ikarisoside B | 661.2211;352.0971;309.0396 | Epimedium |
| 98 | | 75.667 | [M-H]- | 329.2348 | 329.2333 | 4.1 | C18H34O5 | 330.24 | trihydroxyoctadecenoic acid | 329.2349;229.1450;211.1349;171.10333;139.1135; 99.0813 | Rhizoma ligustici wallichii |
| 99 | | 75.887 | [M-H]- | 267.0662 | 267.0663 | -0.3 | C16H12O4 | 268.26 | Formononetin | 267.0666;252.0442;223.0395;195.0443;132.0219; 91.0207 | Astragalus |
| 100 | | 76.219 | [M+HCOO]- | 991.516 | 991.5119 | 4.1 | C47H78O19 | 947.11 | astragalosideⅤor astragalosideⅥ | 991.5196;945.5139;783.4542;119.0350 | Astragalus |
| 101 | | 76.360 | [M-H]- | 645.2211 | 645.2189 | 3.4 | C32H38O14 | 646.23 | sagittatoside B | 645.2252;352.0974 | Epimedium |
| 102 | | 76.683 | [M+H]+ | 303.123 | 303.1227 | 1 | C17H18O5 | 302.32 | 2',​4-​Dihydroxy-​4',6'-dimethoxydihydrochal​cone | 153.0552;125.0605;94.0415;79.0542 | Dragon's Blood |
| 103 | | 77.165 | [M-H]- | 499.1651 | 499.161 | 8.3 | C26H28O10 | 500.17 | Baohuoside Ⅱ | 499.1667;353.1053;309.0419;281.0473;227.0355 | Epimedium |
| 104 | | 77.181 | [M+HCOO]- | 829.4667 | 829.4591 | 9.1 | C41H68O14 | 784.97 | astragaloside Ⅳ | 829.4715;783.4607;621.4195;179.0593 | Astragalus |
| 105 | | 77.436 | [M+HCOO]- | 829.4664 | 829.4591 | 8.8 | C41H68O14 | 784.97 | isoastragaloside Ⅳ | 829.4654;783.4574;621.3983;489.3602;161.0448 | Astragalus |
| 106 | | 77.908 | [M-H]- | 285.114 | 285.1132 | 2.7 | C17H18O4 | 286.12 | Loureirin A | 285.1192;165.0576;153.0575;138.0331;119.0514 | Dragon's Blood |
| 107 | | 78.346 | [M+H]+ | 317.138 | 317.1384 | -1.1 | C18H20O5 | 316.35 | Loureirin B | 167.0701;137.0592;109.0640;103.0534;91.0536; 79.0536 | Dragon's Blood |
| 108 | | 78.683 | [M-H]- | 675.2331 | 675.2294 | 5.4 | C33H40O15 | 676.24 | Baohuoside Ⅶ | 675.2353;367.1198;351.0884;323.0934 | Epimedium |
| 109 | | 78.854 | [M+H]+ | 285.1123 | 285.1121 | 0.6 | C17H16O4 | 284.31 | 2,4-dimethoxy-4'-hydroxydihydrochalcone | 105.0332;77.0380;51.0227 | Dragon's Blood |
| 110 | | 79.013 | [M+HCOO]- | 871.4765 | 871.4697 | 7.8 | C43H70O15 | 827.01 | astragaloside Ⅱ | 871.4770;825.4713;179.0561;59.0143 | Astragalus |
| 111 | | 79.612 | [M-H]- | 659.237 | 659.2345 | 3.7 | C33H40O14 | 660.24 | 2''-O-rhamnosylikarisoside II | 659.2381;366.1102;351.0855;323.0913;311.0538 | Epimedium |
| 112 | | 80.074 | [M+HCOO]- | 871.4753 | 871.4697 | 6.5 | C43H70O15 | 827.01 | isoastragalosideⅡ | 871.4796;825.4668;603.3879;161.0454;89.0243 | Astragalus |
| 113 | | 80.260 | [M+H]+ | 317.1382 | 317.1384 | -0.5 | C18H20O5 | 316.35 | 7,3'-Dihydroxy-8,4'-dimethoxyhomoisoflavane | 177.0920;153.0555;125.0600;94.0410;79.0537; 77.0382 | Dragon's Blood |
| 114 | | 80.321 | [M+H]+ | 193.1216 | 193.1223 | -3.7 | C12H16O2 | 192.12 | Senkyunolide A | 137.0582;105.0681;91.0528;77.0375;51.0215 | Rhizoma ligustici wallichii |
| 115 | | 80.886 | [M+HCOO]- | 871.4764 | 871.4697 | 7.7 | C43H70O15 | 827.01 | isomer of astragaloside Ⅱ | 871.4775;825.2710;603.3941;179.0546 | Astragalus |
| 116 | | 80.893 | [M-H]- | 513.1784 | 513.1766 | 3.5 | C27H34O10 | 514.18 | baohuosideI | 513.1794;366.1106;351.0879;323.0934;217.0501 | Epimedium |
| 117 | | 82.29 | [M+HCOO]- | 913.4863 | 913.4802 | 6.6 | C45H72O16 | 869.04 | astragaloside I | 913.4958;867.4860;765.4416 | Astragalus |
| 118 | | 83.202 | [M+HCOO]- | 913.4885 | 913.4802 | 9 | C45H72O16 | 869.04 | isoastragaloside I | 913.4937;867.2856;747.4496 | Astragalus |
| 119 | | 83.285 | [M+H]+ | 257.1179 | 257.1172 | 2.6 | C16H16O3 | 256.30 | Pterostilbene | 257.1167;153.0545;125.0593;94.0409;77.0374;66.0449 | Dragon's Blood |
| 120 | | 84.187 | [M+H]+ | 271.133 | 270.125 | 0.5 | C17H18O3 | 270.32 | 4'-hydroxy-7-methoxy-8-methylflavan | 271.1331;167.0707;137.0600;117.0696;109.0648;91.0542;79.0541 | Dragon's Blood |
| 121 | | 84.383 | [M+HCOO]- | 913.4898 | 913.4802 | 10.5 | C45H72O16 | 869.04 | isomer of astragaloside I | 913.4918;867.4941;59.0144 | Astragalus |

**Table S2. Predicted targets of components detected**

| gene ID | gene symbol | gene ID | gene symbol | gene ID | gene symbol | gene ID | gene symbol |
| --- | --- | --- | --- | --- | --- | --- | --- |
| 842 | CASP9 | 6595 | SMARCA2 | 5786 | PTPRA | 59341 | TRPV4 |
| 2475 | MTOR | 5650 | KLK7 | 3958 | LGALS3 | 2735 | GLI1 |
| 142 | PARP1 | 1814 | DRD3 | 3963 | LGALS7 | 1841 | DTYMK |
| 5170 | PDPK1 | 23435 | TARDBP | 3965 | LGALS9 | 6513 | SLC2A1 |
| 836 | CASP3 | 6622 | SNCA | 695 | BTK | 107 | ADCY1 |
| 1956 | EGFR | 5305 | PIP4K2A | 3674 | ITGA2B | 5524 | PTPA |
| 2932 | GSK3B | 23408 | SIRT5 | 2053 | EPHX2 | 7915 | ALDH5A1 |
| 84335 | AKT1S1 | 7849 | PAX8 | 1457 | CSNK2A1 | 18 | ABAT |
| 841 | CASP8 | 6275 | S100A4 | 2885 | GRB2 | 4151 | MB |
| 673 | BRAF | 51752 | ERAP1 | 1459 | CSNK2A2 | 251 | ALPG |
| 3269 | HRH1 | 3276 | PRMT1 | 1973 | EIF4A1 | 9373 | PLAA |
| 9768 | PCLAF | 7026 | NR2F2 | 2155 | F7 | 3736 | KCNA1 |
| 2147 | F2 | 8932 | MBD2 | 2222 | FDFT1 | 3739 | KCNA4 |
| 4313 | MMP2 | 6401 | SELE | 6240 | RRM1 | 5693 | PSMB5 |
| 7299 | TYR | 839 | CASP6 | 276 | AMY1A | 1621 | DBH |
| 645 | BLVRB | 29128 | UHRF1 | 84444 | DOT1L | 6716 | SRD5A2 |
| 472 | ATM | 5347 | PLK1 | 9407 | TMPRSS11D | 9 | NAT1 |
| 3146 | HMGB1 | 102 | ADAM10 | 6768 | ST14 | 2033 | EP300 |
| 5243 | ABCB1 | 5621 | PRNP | 7422 | VEGFA | 1394 | CRHR1 |
| 3725 | JUN | 6868 | ADAM17 | 2158 | F9 | 7172 | TPMT |
| 7367 | UGT2B17 | 51567 | TDP2 | 3695 | ITGB7 | 8639 | AOC3 |
| 2625 | GATA3 | 5335 | PLCG1 | 2246 | FGF1 | 1515 | CTSV |
| 9451 | EIF2AK3 | 5331 | PLCB3 | 2247 | FGF2 | 476 | ATP1A1 |
| 207 | AKT1 | 10411 | RAPGEF3 | 2938 | GSTA1 | 10558 | SPTLC1 |
| 5594 | MAPK1 | 11069 | RAPGEF4 | 2950 | GSTP1 | 9517 | SPTLC2 |
| 7157 | TP53 | 50487 | PLA2G3 | 10855 | HPSE | 6336 | SCN10A |
| 3949 | LDLR | 3553 | IL1B | 279 | AMY2A | 7067 | THRA |
| 255738 | PCSK9 | 11168 | PSIP1 | 4012 | LNPEP | 55818 | KDM3A |
| 3162 | HMOX1 | 54414 | SIAE | 64167 | ERAP2 | 23081 | KDM4C |
| 1803 | DPP4 | 23411 | SIRT1 | 3693 | ITGB5 | 7177 | TPSAB1 |
| 595 | CCND1 | 4353 | MPO | 1269 | CNR2 | 5138 | PDE2A |
| 517 | ATP5MC2 | 55361 | PI4K2A | 64805 | P2RY12 | 7852 | CXCR4 |
| 9356 | SLC22A6 | 5745 | PTH1R | 5729 | PTGDR | 7174 | TPP2 |
| 9376 | SLC22A8 | 231 | AKR1B1 | 11251 | PTGDR2 | 29943 | PADI1 |
| 10280 | SIGMAR1 | 57016 | AKR1B10 | 1436 | CSF1R | 3488 | IGFBP5 |
| 2152 | F3 | 3763 | KCNJ6 | 5894 | RAF1 | 11240 | PADI2 |
| 10864 | SLC22A7 | 2529 | FUT7 | 2324 | FLT4 | 51702 | PADI3 |
| 1312 | COMT | 760 | CA2 | 5737 | PTGFR | 5152 | PDE9A |
| 847 | CAT | 759 | CA1 | 9212 | AURKB | 5153 | PDE1B |
| 8654 | PDE5A | 763 | CA5A | 2159 | F10 | 11343 | MGLL |
| 4846 | NOS3 | 367 | AR | 4914 | NTRK1 | 271 | AMPD2 |
| 2099 | ESR1 | 766 | CA7 | 2356 | FPGS | 5747 | PTK2 |
| 57104 | PNPLA2 | 765 | CA6 | 558 | AXL | 4751 | NEK2 |
| 949 | SCARB1 | 768 | CA9 | 4915 | NTRK2 | 4597 | MVD |
| 5141 | PDE4A | 23632 | CA14 | 4921 | DDR2 | 5916 | RARG |
| 8600 | TNFSF11 | 761 | CA3 | 1789 | DNMT3B | 5915 | RARB |
| 54576 | UGT1A8 | 771 | CA12 | 2353 | FOS | 1E+08 | PLA2G4B |
| 54577 | UGT1A7 | 762 | CA4 | 3675 | ITGA3 | 6257 | RXRB |
| 54205 | CYCS | 11238 | CA5B | 2857 | GPR34 | 6258 | RXRG |
| 405754 | ERVFRD-1 | 2526 | FUT4 | 3673 | ITGA2 | 4953 | ODC1 |
| 2920 | CXCL2 | 6403 | SELP | 887 | CCKBR | 993 | CDC25A |
| 2921 | CXCL3 | 2737 | GLI3 | 2346 | FOLH1 | 2914 | GRM4 |
| 2919 | CXCL1 | 5914 | RARA | 4311 | MME | 2890 | GRIA1 |
| 1633 | DCK | 6402 | SELL | 3990 | LIPC | 3815 | KIT |
| 4860 | PNP | 2101 | ESRRA | 9388 | LIPG | 6446 | SGK1 |
| 161291 | TMEM30B | 3576 | CXCL8 | 1742 | DLG4 | 10682 | EBP |
| 55754 | TMEM30A | 3315 | HSPB1 | 5644 | PRSS1 | 2103 | ESRRB |
| 30816 | ERVW-1 | 9971 | NR1H4 | 1509 | CTSD | 6198 | RPS6KB1 |
| 7498 | XDH | 1588 | CYP19A1 | 3688 | ITGB1 | 55847 | CISD1 |
| 9615 | GDA | 1636 | ACE | 5604 | MAP2K1 | 9252 | RPS6KA5 |
| 316 | AOX1 | 2280 | FKBP1A | 29881 | NPC1L1 | 27306 | HPGDS |
| 3251 | HPRT1 | 3043 | HBB | 2188 | FANCF | 9448 | MAP4K4 |
| 136 | ADORA2B | 3091 | HIF1A | 3105 | HLA-A | 29952 | DPP7 |
| 353 | APRT | 5743 | PTGS2 | 3480 | IGF1R | 2044 | EPHA5 |
| 4507 | MTAP | 4233 | MET | 5646 | PRSS3 | 2043 | EPHA4 |
| 3356 | HTR2A | 6256 | RXRA | 208 | AKT2 | 2046 | EPHA8 |
| 3350 | HTR1A | 5467 | PPARD | 6195 | RPS6KA1 | 2045 | EPHA7 |
| 191 | AHCY | 54658 | UGT1A1 | 6093 | ROCK1 | 2049 | EPHB3 |
| 1576 | CYP3A4 | 7124 | TNF | 57704 | GBA2 | 2042 | EPHA3 |
| 6002 | RGS12 | 5465 | PPARA | 1241 | LTB4R | 2047 | EPHB1 |
| 2770 | GNAI1 | 6097 | RORC | 3791 | KDR | 2041 | EPHA1 |
| 247 | ALOX15B | 8856 | NR1I2 | 2339 | FNTA | 51171 | HSD17B14 |
| 3248 | HPGD | 28234 | SLCO1B3 | 5651 | TMPRSS15 | 4697 | NDUFA4 |
| 246 | ALOX15 | 10599 | SLCO1B1 | 823 | CAPN1 | 3984 | LIMK1 |
| 840 | CASP7 | 22926 | ATF6 | 3683 | ITGAL | 1759 | DNM1 |
| 834 | CASP1 | 5226 | PGD | 6715 | SRD5A1 | 219972 | MPEG1 |
| 216 | ALDH1A1 | 2581 | GALC | 2739 | GLO1 | 23239 | PHLPP1 |
| 239 | ALOX12 | 9970 | NR1I3 | 1719 | DHFR | 8850 | KAT2B |
| 4137 | MAPT | 9734 | HDAC9 | 27334 | P2RY10 | 4048 | LTA4H |
| 2717 | GLA | 2854 | GPR32 | 84636 | GPR174 | 5731 | PTGER1 |
| 7068 | THRB | 5241 | PGR | 10203 | CALCRL | 5734 | PTGER4 |
| 3064 | HTT | 4087 | SMAD2 | 3960 | LGALS4 | 10057 | ABCC5 |
| 4221 | MEN1 | 2534 | FYN | 3964 | LGALS8 | 9020 | MAP3K14 |
| 4297 | KMT2A | 4312 | MMP1 | 5054 | SERPINE1 | 801 | CALM1 |
| 2629 | GBA | 7276 | TTR | 7357 | UGCG | 51086 | TNNI3K |
| 2548 | GAA | 3932 | LCK | 5173 | PDYN | 873 | CBR1 |
| 2597 | GAPDH | 6714 | SRC | 1139 | CHRNA7 | 5444 | PON1 |
| 641 | BLM | 3373 | HYAL1 | 2562 | GABRB3 | 5327 | PLAT |
| 2648 | KAT2A | 1499 | CTNNB1 | 241 | ALOX5AP | 5753 | PTK6 |
| 7421 | VDR | 5742 | PTGS1 | 3292 | HSD17B1 | 3489 | IGFBP6 |
| 5999 | RGS4 | 6777 | STAT5B | 8569 | MKNK1 | 3487 | IGFBP4 |
| 7398 | USP1 | 8912 | CACNA1H | 6548 | SLC9A1 | 3485 | IGFBP2 |
| 60489 | APOBEC3G | 4609 | MYC | 11200 | CHEK2 | 6272 | SORT1 |
| 51426 | POLK | 1081 | CGA | 2558 | GABRA5 | 3484 | IGFBP1 |
| 55775 | TDP1 | 8484 | GALR3 | 2554 | GABRA1 | 11156 | PTP4A3 |
| 115004 | CGAS | 2516 | NR5A1 | 5664 | PSEN2 | 2904 | GRIN2B |
| 2271 | FH | 3558 | IL2 | 5027 | P2RX7 | 53831 | GPR84 |
| 213 | ALB | 43 | ACHE | 2847 | MCHR1 | 1453 | CSNK1D |
| 1565 | CYP2D6 | 590 | BCHE | 3702 | ITK | 23476 | BRD4 |
| 1557 | CYP2C19 | 7015 | TERT | 5581 | PRKCE | 5478 | PPIA |
| 7253 | TSHR | 11309 | SLCO2B1 | 238 | ALK | 587 | BCAT2 |
| 1544 | CYP1A2 | 1644 | DDC | 90 | ACVR1 | 7225 | TRPC6 |
| 4792 | NFKBIA | 3065 | HDAC1 | 120892 | LRRK2 | 3383 | ICAM1 |
| 2908 | NR3C1 | 83933 | HDAC10 | 4282 | MIF | 84875 | PARP10 |
| 5142 | PDE4B | 55869 | HDAC8 | 5209 | PFKFB3 | 6232 | RPS27 |
| 1559 | CYP2C9 | 51564 | HDAC7 | 5293 | PIK3CD | 7535 | ZAP70 |
| 4286 | MITF | 10013 | HDAC6 | 5591 | PRKDC | 4067 | LYN |
| 65975 | STK33 | 79885 | HDAC11 | 5291 | PIK3CB | 7010 | TEK |
| 3417 | IDH1 | 3066 | HDAC2 | 3055 | HCK | 1584 | CYP11B1 |
| 3400 | ID4 | 9759 | HDAC4 | 2050 | EPHB4 | 3290 | HSD11B1 |
| 7468 | NSD2 | 10014 | HDAC5 | 898 | CCNE1 | 892 | CCNC |
| 2146 | EZH2 | 920 | CD4 | 1585 | CYP11B2 | 2915 | GRM5 |
| 55704 | CCDC88A | 4159 | MC3R | 23035 | PHLPP2 | 2911 | GRM1 |
| 3458 | IFNG | 10800 | CYSLTR1 | 10733 | PLK4 | 27163 | NAAA |
| 10413 | YAP1 | 4161 | MC5R | 2872 | MKNK2 | 2997 | GYS1 |
| 9367 | RAB9A | 4128 | MAOA | 5599 | MAPK8 | 1263 | PLK3 |
| 2744 | GLS | 1129 | CHRM2 | 7272 | TTK | 10769 | PLK2 |
| 11201 | POLI | 1131 | CHRM3 | 54878 | DPP8 | 427 | ASAH1 |
| 29994 | BAZ2B | 1991 | ELANE | 91039 | DPP9 | 5603 | MAPK13 |
| 1903 | S1PR3 | 5724 | PTAFR | 131890 | GRK7 | 1140 | CHRNB1 |
| 3312 | HSPA8 | 1511 | CTSG | 147746 | HIPK4 | 55170 | PRMT6 |
| 4323 | MMP14 | 5595 | MAPK3 | 9344 | TAOK2 | 56341 | PRMT8 |
| 26191 | PTPN22 | 5530 | PPP3CA | 5288 | PIK3C2G | 3352 | HTR1D |
| 4088 | SMAD3 | 4318 | MMP9 | 1374 | CPT1A | 1445 | CSK |
| 5468 | PPARG | 5578 | PRKCA | 79837 | PIP4K2C | 5547 | PRCP |
| 8648 | NCOA1 | 1432 | MAPK14 | 8573 | CASK | 11255 | HRH3 |
| 2100 | ESR2 | 2064 | ERBB2 | 23396 | PIP5K1C | 4889 | NPY5R |
| 2161 | F12 | 5788 | PTPRC | 25778 | DSTYK | 3355 | HTR1F |
| 8202 | NCOA3 | 155 | ADRB3 | 5580 | PRKCD | 59340 | HRH4 |
| 5879 | RAC1 | 150 | ADRA2A | 5583 | PRKCH | 6885 | MAP3K7 |
| 3265 | HRAS | 134 | ADORA1 | 6713 | SQLE | 7378 | UPP1 |
| 1981 | EIF4G1 | 146 | ADRA1D | 5582 | PRKCG | 284111 | SLC13A5 |
| 4887 | NPY2R | 151 | ADRA2B | 5733 | PTGER3 | 8564 | KMO |
| 5587 | PRKD1 | 135 | ADORA2A | 10131 | TRAP1 | 7407 | VARS1 |
| 8811 | GALR2 | 140 | ADORA3 | 84634 | KISS1R | 51520 | LARS1 |
| 4363 | ABCC1 | 6530 | SLC6A2 | 4843 | NOS2 | 55693 | KDM4D |
| 6774 | STAT3 | 152 | ADRA2C | 1230 | CCR1 | 10765 | KDM5B |
| 25818 | KLK5 | 3357 | HTR2B | 22992 | KDM2A | 51056 | LAP3 |
| 6772 | STAT1 | 186 | AGTR2 | 23135 | KDM6B | 2837 | UTS2R |
| 5732 | PTGER2 | 153 | ADRB1 | 2642 | GCGR | 779 | CACNA1S |
| 596 | BCL2 | 6532 | SLC6A4 | 1785 | DNM2 | 2798 | GNRHR |
| 10017 | BCL2L10 | 799 | CALCR | 3738 | KCNA3 | 4836 | NMT1 |
| 599 | BCL2L2 | 3358 | HTR2C | 5340 | PLG | 781 | CACNA2D1 |
| 249 | ALPL | 2321 | FLT1 | 377677 | CA13 | 9254 | CACNA2D2 |
| 598 | BCL2L1 | 7433 | VIPR1 | 5319 | PLA2G1B | 3360 | HTR4 |
| 597 | BCL2A1 | 3577 | CXCR1 | 6646 | SOAT1 | 7301 | TYRO3 |
| 4170 | MCL1 | 886 | CCKAR | 8435 | SOAT2 | 55872 | PBK |
| 4886 | NPY1R | 3362 | HTR6 | 23621 | BACE1 | 1147 | CHUK |
| 4351 | MPI | 1234 | CCR5 | 4126 | MANBA | 7297 | TYK2 |
| 3303 | HSPA1A | 1268 | CNR1 | 5972 | REN | 3832 | KIF11 |
| 1738 | DLD | 3579 | CXCR2 | 1650 | DDOST | 2693 | GHSR |
| 5970 | RELA | 624 | BDKRB2 | 3551 | IKBKB | 1592 | CYP26A1 |
| 4790 | NFKB1 | 729230 | CCR2 | 1910 | EDNRB | 1075 | CTSC |
| 3630 | INS | 6869 | TACR1 | 3816 | KLK1 | 1024 | CDK8 |
| 351 | APP | 1571 | CYP2E1 | 3817 | KLK2 | 9152 | SLC6A5 |
| 653361 | NCF1 | 1233 | CCR4 | 5163 | PDK1 | 10000 | AKT3 |
| 7465 | WEE1 | 6865 | TACR2 | 9833 | MELK | 706 | TSPO |
| 9429 | ABCG2 | 1909 | EDNRA | 185 | AGTR1 | 5320 | PLA2G2A |
| 5888 | RAD51 | 6916 | TBXAS1 | 3939 | LDHA | 5322 | PLA2G5 |
| 2775 | GNAO1 | 1815 | DRD4 | 5584 | PRKCI | 5111 | PCNA |
| 85397 | RGS8 | 1548 | CYP2A6 | 117 | ADCYAP1R1 | 896 | CCND3 |
| 10287 | RGS19 | 3274 | HRH2 | 7184 | HSP90B1 | 5610 | EIF2AK2 |
| 865 | CBFB | 3156 | HMGCR | 572 | BAD | 8399 | PLA2G10 |
| 861 | RUNX1 | 2542 | SLC37A4 | 2203 | FBP1 | 2052 | EPHX1 |
| 6000 | RGS7 | 54600 | UGT1A9 | 1723 | DHODH | 5136 | PDE1A |
| 6004 | RGS16 | 54578 | UGT1A6 | 84262 | PSMG3 | 5139 | PDE3A |
| 8743 | TNFSF10 | 5328 | PLAU | 3818 | KLKB1 | 5140 | PDE3B |
| 3717 | JAK2 | 5770 | PTPN1 | 11040 | PIM2 | 25865 | PRKD2 |
| 55283 | MCOLN3 | 410 | ARSA | 415116 | PIM3 | 6319 | SCD |
| 57468 | SLC12A5 | 240 | ALOX5 | 2289 | FKBP5 | 1728 | NQO1 |
| 6607 | SMN2 | 3326 | HSP90AB1 | 9134 | CCNE2 | 6335 | SCN9A |
| 387129 | NPSR1 | 5376 | PMP22 | 29883 | CNOT7 | 7494 | XBP1 |
| 7415 | VCP | 5778 | PTPN7 | 6755 | SSTR5 | 4139 | MARK1 |
| 4000 | LMNA | 1843 | DUSP1 | 6752 | SSTR2 | 6196 | RPS6KA2 |
| 10741 | RBBP9 | 7532 | YWHAG | 6754 | SSTR4 | 4486 | MST1R |
| 8698 | S1PR4 | 994 | CDC25B | 6751 | SSTR1 | 652 | BMP4 |
| 3757 | KCNH2 | 8314 | BAP1 | 6753 | SSTR3 | 1675 | CFD |
| 4215 | MAP3K3 | 1901 | S1PR1 | 8972 | MGAM | 7054 | TH |
| 5871 | MAP4K2 | 2357 | FPR1 | 2517 | FUCA1 | 2990 | GUSB |
| 64127 | NOD2 | 2358 | FPR2 | 5588 | PRKCQ | 10531 | PITRM1 |
| 162466 | PHOSPHO1 | 1508 | CTSB | 4316 | MMP7 | 10298 | PAK4 |
| 10392 | NOD1 | 5566 | PRKACA | 3099 | HK2 | 3611 | ILK |
| 5315 | PKM | 1520 | CTSS | 3098 | HK1 | 64772 | ENGASE |
| 1845 | DUSP3 | 1514 | CTSL | 6476 | SI | 2936 | GSR |
| 688 | KLF5 | 716 | C1S | 2272 | FHIT | 47 | ACLY |
| 4986 | OPRK1 | 6095 | RORA | 129807 | NEU4 | 2870 | GRK6 |
| 3320 | HSP90AA1 | 4322 | MMP13 | 4325 | MMP16 | 8443 | GNPAT |
| 5339 | PLEC | 3354 | HTR1E | 5422 | POLA1 | 4804 | NGFR |
| 2831 | NPBWR1 | 9475 | ROCK2 | 5428 | POLG | 1488 | CTBP2 |
| 2584 | GALK1 | 5602 | MAPK10 | 124 | ADH1A | 10926 | DBF4 |
| 9290 | GPR55 | 7066 | THPO | 2897 | GRIK1 | 1357 | CPA1 |
| 9446 | GSTO1 | 2875 | GPT | 2898 | GRIK2 | 2550 | GABBR1 |
| 5536 | PPP5C | 54737 | MPHOSPH8 | 2899 | GRIK3 | 5029 | P2RY2 |
| 7458 | EIF4H | 338442 | HCAR2 | 1890 | TYMP | 5031 | P2RY6 |
| 10054 | UBA2 | 7098 | TLR3 | 471 | ATIC | 3482 | IGF2R |
| 10055 | SAE1 | 5781 | PTPN11 | 10825 | NEU3 | 3291 | HSD11B2 |
| 7329 | UBE2I | 1109 | AKR1C4 | 4759 | NEU2 | 2335 | FN1 |
| 26986 | PABPC1 | 1645 | AKR1C1 | 11181 | TREH | 5495 | PPM1B |
| 2859 | GPR35 | 1646 | AKR1C2 | 835 | CASP2 | 5501 | PPP1CC |
| 22861 | NLRP1 | 8644 | AKR1C3 | 2028 | ENPEP | 5525 | PPP2R5A |
| 774 | CACNA1B | 54583 | EGLN1 | 1969 | EPHA2 | 5168 | ENPP2 |
| 51400 | PPME1 | 2646 | GCKR | 5030 | P2RY4 | 9170 | LPAR2 |
| 10434 | LYPLA1 | 2645 | GCK | 4255 | MGMT | 1902 | LPAR1 |
| 203068 | TUBB | 4350 | MPG | 6331 | SCN5A | 6041 | RNASEL |
| 5499 | PPP1CA | 1017 | CDK2 | 6329 | SCN4A | 1103 | CHAT |
| 10002 | NR2E3 | 890 | CCNA2 | 6326 | SCN2A | 7052 | TGM2 |
| 5725 | PTBP1 | 4881 | NPR1 | 7226 | TRPM2 | 1586 | CYP17A1 |
| 5021 | OXTR | 4882 | NPR2 | 8824 | CES2 | 1326 | MAP3K8 |
| 10018 | BCL2L11 | 961 | CD47 | 6462 | SHBG | 7048 | TGFBR2 |
| 187 | APLNR | 140885 | SIRPA | 5494 | PPM1A | 9641 | IKBKE |
| 248 | ALPI | 5837 | PYGM | 2741 | GLRA1 | 5564 | PRKAB1 |
| 123228 | SENP8 | 3363 | HTR7 | 2742 | GLRA2 | 657 | BMPR1A |
| 3676 | ITGA4 | 5790 | PTPRCAP | 4099 | MAG | 94 | ACVRL1 |
| 26054 | SENP6 | 1543 | CYP1A1 | 412 | STS | 659 | BMPR2 |
| 3784 | KCNQ1 | 6523 | SLC5A1 | 272 | AMPD3 | 658 | BMPR1B |
| 2931 | GSK3A | 6524 | SLC5A2 | 440 | ASNS | 10555 | AGPAT2 |
| 4154 | MBNL1 | 4791 | NFKB2 | 10003 | NAALAD2 | 5618 | PRLR |
| 59350 | RXFP1 | 3758 | KCNJ1 | 4293 | MAP3K9 | 25825 | BACE2 |
| 8841 | HDAC3 | 217 | ALDH2 | 5792 | PTPRF | 6870 | TACR3 |
| 196 | AHR | 4129 | MAOB | 5515 | PPP2CA | 23620 | NTSR2 |
| 9581 | PREPL | 3778 | KCNMA1 | 9507 | ADAMTS4 | 101 | ADAM8 |
| 552 | AVPR1A | 10242 | KCNMB2 | 719 | C3AR1 | 4157 | MC1R |
| 114548 | NLRP3 | 3779 | KCNMB1 | 11091 | WDR5 | 5520 | PPP2R2A |
| 57337 | SENP7 | 27345 | KCNMB4 | 8445 | DYRK2 | 4883 | NPR3 |
| 3416 | IDE | 389816 | LRRC26 | 1215 | CMA1 | 623 | BDKRB1 |
| 3061 | HCRTR1 | 1545 | CYP1B1 | 4878 | NPPA | 115584 | SLC5A11 |
| 6531 | SLC6A3 | 4835 | NQO2 | 1889 | ECE1 | 58497 | PRUNE1 |
| 23569 | PADI4 | 613 | BCR | 5601 | MAPK9 | 29126 | CD274 |
| 7941 | PLA2G7 | 8828 | NRP2 | 27159 | CHIA | 53944 | CSNK1G1 |
| 5045 | FURIN | 54657 | UGT1A4 | 1513 | CTSK | 25842 | ASF1A |
| 84557 | MAP1LC3A | 7366 | UGT2B15 | 1977 | EIF4E | 9891 | NUAK1 |
| 9099 | USP2 | 83756 | TAS1R3 | 10724 | OGA | 5229 | PGGT1B |
| 7334 | UBE2N | 80835 | TAS1R1 | 7083 | TK1 | 27443 | CECR2 |
| 4864 | NPC1 | 6778 | STAT6 | 79813 | EHMT1 | 11176 | BAZ2A |
| 5423 | POLB | 64078 | SLC28A3 | 6011 | GRK1 | 91 | ACVR1B |
| 1813 | DRD2 | 100 | ADA | 80854 | SETD7 | 6046 | BRD2 |
| 2671 | GFER | 9154 | SLC28A1 | 1610 | DAO | 8019 | BRD3 |
| 4193 | MDM2 | 9153 | SLC28A2 | 6723 | SRM | 1387 | CREBBP |
| 4194 | MDM4 | 132 | ADK | 27250 | PDCD4 | 7132 | TNFRSF1A |
| 26013 | L3MBTL1 | 2030 | SLC29A1 | 3620 | IDO1 | 32 | ACACB |
| 156 | GRK2 | 55300 | PI4K2B | 6036 | RNASE2 | 55193 | PBRM1 |
| 2139 | EYA2 | 5298 | PI4KB | 6035 | RNASE1 | 6597 | SMARCA4 |
| 8851 | CDK5R1 | 5297 | PI4KA | 29072 | SETD2 | 2073 | ERCC5 |
| 1020 | CDK5 | 2260 | FGFR1 | 10498 | CARM1 | 5321 | PLA2G4A |
| 60482 | SLC5A7 | 2261 | FGFR3 | 262 | AMD1 | 8242 | KDM5C |
| 317 | APAF1 | 2263 | FGFR2 | 8836 | GGH | 3978 | LIG1 |
| 154 | ADRB2 | 2264 | FGFR4 | 3073 | HEXA | 332 | BIRC5 |
| 5049 | PAFAH1B2 | 3643 | INSR | 3074 | HEXB | 23178 | PASK |
| 5051 | PAFAH2 | 5159 | PDGFRB | 4314 | MMP3 | 7084 | TK2 |
| 7251 | TSG101 | 3615 | IMPDH2 | 2946 | GSTM2 | 3938 | LCT |
| 5050 | PAFAH1B3 | 3614 | IMPDH1 | 54681 | P4HTM | 2720 | GLB1 |
| 7137 | TNNI3 | 3177 | SLC29A2 | 5028 | P2RY1 | 1021 | CDK6 |
| 7139 | TNNT2 | 5579 | PRKCB | 5032 | P2RY11 | 4306 | NR3C2 |
| 7134 | TNNC1 | 5232 | PGK2 | 6611 | SMS | 2555 | GABRA2 |
| 200315 | APOBEC3A | 5230 | PGK1 | 10768 | AHCYL1 | 81890 | QTRT1 |
| 51099 | ABHD5 | 161823 | ADAL | 8647 | ABCB11 | 2191 | FAP |
| 440503 | PLIN5 | 57413 | TMIGD3 | 23028 | KDM1A | 5550 | PREP |
| 5346 | PLIN1 | 54795 | TRPM4 | 10988 | METAP2 | 79077 | DCTPP1 |
| 4923 | NTSR1 | 978 | CDA | 3735 | KARS1 | 8694 | DGAT1 |
| 7201 | TRHR | 790 | CAD | 649 | BMP1 | 25797 | QPCT |
| 58190 | CTDSP1 | 83549 | UCK1 | 9261 | MAPKAPK2 | 6566 | SLC16A1 |
| 1235 | CCR6 | 5143 | PDE4C | 9612 | NCOR2 | 8517 | IKBKG |
| 80201 | HKDC1 | 5144 | PDE4D | 9611 | NCOR1 | 747 | DAGLA |
| 4988 | OPRM1 | 3172 | HNF4A | 64386 | MMP25 | 218 | ALDH3A1 |
| 4985 | OPRD1 | 79068 | FTO | 1591 | CYP24A1 | 7412 | VCAM1 |
| 221955 | DAGLB | 54890 | ALKBH5 | 2166 | FAAH | 10196 | PRMT3 |
| 1080 | CFTR | 9033 | PKD2L1 | 5292 | PIM1 | 2868 | GRK4 |
| 57120 | GOPC | 8989 | TRPA1 | 3718 | JAK3 | 5834 | PYGB |
| 4780 | NFE2L2 | 5965 | RECQL | 1198 | CLK3 | 6839 | SUV39H1 |
| 79915 | ATAD5 | 3028 | HSD17B10 | 2208 | FCER2 | 11185 | INMT |
| 23192 | ATG4B | 390245 | KDM4E | 329 | BIRC2 | 56950 | SMYD2 |
| 408 | ARRB1 | 328 | APEX1 | 290 | ANPEP | 2145 | EZH1 |
| 9817 | KEAP1 | 3309 | HSPA5 | 496 | ATP4B | 9869 | SETDB1 |
| 3361 | HTR5A | 10919 | EHMT2 | 5156 | PDGFRA | 5917 | RARS1 |
| 1812 | DRD1 | 9682 | KDM4A | 64146 | PDF | 5023 | P2RX1 |
| 5577 | PRKAR2B | 2160 | F11 | 29110 | TBK1 | 54496 | PRMT7 |
| 5567 | PRKACB | 998 | CDC42 | 9572 | NR1D1 | 8505 | PARG |
| 54106 | TLR9 | 7099 | TLR4 | 11096 | ADAMTS5 | 3376 | IARS1 |
| 190 | NR0B1 | 331 | XIAP | 2185 | PTK2B | 10591 | DNPH1 |
| 10576 | CCT2 | 11313 | LYPLA2 | 10381 | TUBB3 | 5167 | ENPP1 |
| 5300 | PIN1 | 3672 | ITGA1 | 5409 | PNMT | 55811 | ADCY10 |
| 6609 | SMPD1 | 51305 | KCNK9 | 157 | GRK3 | 8473 | OGT |
| 5901 | RAN | 5654 | HTRA1 | 2869 | GRK5 | 5927 | KDM5A |
| 10073 | SNUPN | 917 | CD3G | 5295 | PIK3R1 | 221037 | JMJD1C |
| 3837 | KPNB1 | 8829 | NRP1 | 2048 | EPHB2 | 7372 | UMPS |
| 7442 | TRPV1 | 29843 | SENP1 | 817 | CAMK2D | 5787 | PTPRB |
| 4160 | MC4R | 65018 | PINK1 | 5150 | PDE7A | 9934 | P2RY14 |
| 10951 | CBX1 | 2244 | FGB | 1232 | CCR3 | 2840 | GPR17 |
| 2395 | FXN | 9173 | IL1RL1 | 2912 | GRM2 | 5033 | P4HA1 |
| 5034 | P4HB | - | B1PRL2 | 554 | AVPR2 | 2683 | B4GALT1 |
| 1786 | DNMT1 | 5836 | PYGL | 7153 | TOP2A | 3776 | KCNK2 |
| 1393 | CRHBP | 148 | ADRA1A | 4638 | MYLK | 150465 | TTL |
| 1395 | CRHR2 | 147 | ADRA1B | 1612 | DAPK1 | 25780 | RASGRP3 |
| 51377 | UCHL5 | 1816 | DRD5 | 8565 | YARS1 | 1512 | CTSH |
| 10213 | PSMD14 | 6915 | TBXA2R | 51135 | IRAK4 | 1066 | CES1 |
| 10058 | ABCB6 | 1717 | DHCR7 | 3486 | IGFBP3 | 1237 | CCR8 |
| 5429 | POLH | 55244 | SLC47A1 | 65220 | NADK | 7514 | XPO1 |
| 259249 | MRGPRX1 | 1136 | CHRNA3 | 59272 | ACE2 | 23173 | METAP1 |
| 84867 | PTPN5 | 1143 | CHRNB4 | 22933 | SIRT2 | 8722 | CTSF |
| 9610 | RIN1 | 3780 | KCNN1 | 3956 | LGALS1 | 715 | C1R |
| 25 | ABL1 | 3782 | KCNN3 | 9536 | PTGES | 50940 | PDE11A |
| 3205 | HOXA9 | 3781 | KCNN2 | 4319 | MMP10 | 27115 | PDE7B |
| 2237 | FEN1 | 3062 | HCRTR2 | 2618 | GART | 1788 | DNMT3A |
| 1128 | CHRM1 | 6571 | SLC18A2 | 4893 | NRAS | 6572 | SLC18A3 |
| 10663 | CXCR6 | 79054 | TRPM8 | 6480 | ST6GAL1 | 9159 | PCSK7 |
| 2194 | FASN | 1137 | CHRNA4 | 4141 | MARS1 | 3991 | LIPE |
| 200316 | APOBEC3F | 3164 | NR4A1 | 80351 | TNKS2 | 1555 | CYP2B6 |
| 8438 | RAD54L | 5979 | RET | 8658 | TNKS | 1504 | CTRB1 |
| 2494 | NR5A2 | 2081 | ERN1 | 5228 | PGF | 676 | BRDT |
| 3777 | KCNK3 | 1111 | CHEK1 | 6897 | TARS1 | 1806 | DPYD |
| 7341 | SUMO1 | 6850 | SYK | 4133 | MAP2 | 5329 | PLAUR |
| 405 | ARNT | 4544 | MTNR1B | 5859 | QARS1 | 4803 | NGF |
| 10460 | TACC3 | 1019 | CDK4 | 5024 | P2RX3 | 23030 | KDM4B |
| 1133 | CHRM5 | 4317 | MMP8 | 3141 | HLCS | 8140 | SLC7A5 |
| 1132 | CHRM4 | 1859 | DYRK1A | 954 | ENTPD2 | 2901 | GRIK5 |
| 9215 | LARGE1 | 1195 | CLK1 | 8317 | CDC7 | 2893 | GRIA4 |
| 2740 | GLP1R | 5551 | PRF1 | 10038 | PARP2 | 2891 | GRIA2 |
| 672 | BRCA1 | 9149 | DYRK1B | 3716 | JAK1 | 23133 | PHF8 |
| 2078 | ERG | 3945 | LDHB | 4750 | NEK1 | 6505 | SLC1A1 |
| 5071 | PRKN | 6790 | AURKA | 23410 | SIRT3 | 6506 | SLC1A2 |
| 8767 | RIPK2 | 4543 | MTNR1A | 5600 | MAPK11 | 54363 | HAO1 |
| 2778 | GNAS | 545 | ATR | 7040 | TGFB1 | 2913 | GRM3 |
| 51053 | GMNN | 5290 | PIK3CA | 29904 | EEF2K | 2918 | GRM8 |
| 29127 | RACGAP1 | 7430 | EZR | 1025 | CDK9 | 2917 | GRM7 |
| 2034 | EPAS1 | 2322 | FLT3 | 51347 | TAOK3 | 2916 | GRM6 |
| 50807 | ASAP1 | 3293 | HSD17B3 | 85417 | CCNB3 | 7364 | UGT2B7 |
| 8795 | TNFRSF10B | 81027 | TUBB1 | 57396 | CLK4 | 2167 | FABP4 |
| 57192 | MCOLN1 | 6507 | SLC1A3 | 1196 | CLK2 | 2170 | FABP3 |
| 134864 | TAAR1 | 5294 | PIK3CG | 5590 | PRKCZ | 2171 | FABP5 |
| 52 | ACP1 | 3294 | HSD17B2 | 4842 | NOS1 | 2169 | FABP2 |
| 6311 | ATXN2 | 3359 | HTR3A | 51179 | HAO2 | 2539 | G6PD |
| 1880 | GPR183 | 7046 | TGFBR1 | 23450 | SF3B3 | 151306 | GPBAR1 |
| 27006 | FGF22 | 259290 | TAS2R31 | 2864 | FFAR1 | 6051 | RNPEP |
| 5893 | RAD52 | 983 | CDK1 | 3123 | HLA-DRB1 | 866 | SERPINA6 |
| 9040 | UBE2M | 10846 | PDE10A | 112398 | EGLN2 | 1056 | CEL |
| 8883 | NAE1 | 6197 | RPS6KA3 | 2833 | CXCR3 | 11330 | CTRC |
| 4300 | MLLT3 | 56923 | NMUR2 | 112399 | EGLN3 | 8398 | PLA2G6 |
| 10130 | PDIA6 | 50507 | NOX4 | 2149 | F2R | 51311 | TLR8 |
| 5932 | RBBP8 | 952 | CD38 | 3351 | HTR1B | 10135 | NAMPT |
| 6495 | SIX1 | 7150 | TOP1 | 5802 | PTPRS | 6555 | SLC10A2 |
| 7486 | WRN | 933 | CD22 | 3125 | HLA-DRB3 | 5624 | PROC |
| 6955 | TRA | 7298 | TYMS | 4190 | MDH1 | 5147 | PDE6D |
| 153562 | MARVELD2 | 3685 | ITGAV | 4191 | MDH2 | 5476 | CTSA |
| 10499 | NCOA2 | 4321 | MMP12 | 260425 | MAGI3 | 5424 | POLD1 |
| 10987 | COPS5 | 5771 | PTPN2 | 2862 | MLNR | 5145 | PDE6A |
|  |  |  |  |  |  | 10461 | MERTK |

**Table S3. Predicted targets of endometriosis**

| gene ID | gene symbol | gene ID | gene symbol | gene ID | gene symbol | gene ID | gene symbol |
| --- | --- | --- | --- | --- | --- | --- | --- |
| 5743 | PTGS2 | 7157 | TP53 | 5024 | P2RX3 | 3098 | HK1 |
| 5241 | PGR | 4211 | MEIS1 | 4982 | TNFRSF11B | 3119 | HLA-DQB1 |
| 1588 | CYP19A1 | 55785 | FGD6 | 1394 | CRHR1 | 3122 | HLA-DRA |
| 3845 | KRAS | 10457 | GPNMB | 1813 | DRD2 | 3207 | HOXA11 |
| 3066 | HDAC2 | 3206 | HOXA10 | 4582 | MUC1 | 3209 | HOXA13 |
| 1E+08 | CDKN2B-AS1 | 23345 | SYNE1 | 442891 | MIR135B | 3212 | HOXB2 |
| 9687 | GREB1 | 3552 | IL1A | 442920 | MIR196B | 3605 | IL17A |
| 2100 | ESR2 | 8871 | SYNJ2 | 89780 | WNT3A | 1544 | CYP1A2 |
| 3292 | HSD17B1 | 2952 | GSTT1 | 22920 | KIFAP3 | 52 | ACP1 |
| 2516 | NR5A1 | 2944 | GSTM1 | 8743 | TNFSF10 | 336 | APOA2 |
| 3484 | IGFBP1 | 79577 | CDC73 | 8678 | BECN1 | 348 | APOE |
| 1956 | EGFR | 1303 | COL12A1 | 8660 | IRS2 | 359 | AQP2 |
| 3479 | IGF1 | 440854 | CAPN14 | 89782 | LMLN | 362 | AQP5 |
| 3294 | HSD17B2 | 93986 | FOXP2 | 8856 | NR1I2 | 472 | ATM |
| 3554 | IL1R1 | 79656 | BEND5 | 90226 | UCN2 | 558 | AXL |
| 5617 | PRL | 80129 | CCDC170 | 406952 | MIR17 | 567 | B2M |
| 406991 | MIR21 | 90865 | IL33 | 54474 | KRT20 | 652 | BMP4 |
| 3600 | IL15 | 119395 | CALHM3 | 54567 | DLL4 | 658 | BMPR1B |
| 405 | ARNT | 1543 | CYP1A1 | 9197 | SLC33A1 | 672 | BRCA1 |
| 6750 | SST | 254827 | NAALADL2 | 9166 | EBAG9 | 673 | BRAF |
| 5734 | PTGER4 | 79228 | THOC6 | 83729 | INHBE | 675 | BRCA2 |
| 2353 | FOS | 2906 | GRIN2D | 55278 | QRSL1 | 330 | BIRC3 |
| 3620 | IDO1 | 84871 | AGBL4 | 26038 | CHD5 | 329 | BIRC2 |
| 687 | KLF9 | 773 | CACNA1A | 406983 | MIR200A | 328 | APEX1 |
| 7026 | NR2F2 | 717 | C2 | 22914 | KLRK1 | 60 | ACTB |
| 8644 | AKR1C3 | 5728 | PTEN | 406984 | MIR200B | 81 | ACTN4 |
| 5076 | PAX2 | 51478 | HSD17B7 | 9242 | MSC | 87 | ACTN1 |
| 23405 | DICER1 | 94025 | MUC16 | 55065 | SLC52A1 | 183 | AGT |
| 231 | AKR1B1 | 1555 | CYP2B6 | 407004 | MIR22 | 186 | AGTR2 |
| 9547 | CXCL14 | 7850 | IL1R2 | 406992 | MIR210 | 199 | AIF1 |
| 10257 | ABCC4 | 3082 | HGF | 9294 | S1PR2 | 213 | ALB |
| 51621 | KLF13 | 3952 | LEP | 664617 | MIR542 | 246 | ALOX15 |
| 59350 | RXFP1 | 4077 | NBR1 | 1E+08 | ENDO1 | 269 | AMHR2 |
| 3115 | HLA-DPB1 | 5594 | MAPK1 | 1E+08 | TMED7-TICAM2 | 283 | ANG |
| 3688 | ITGB1 | 4282 | MIF | 1.01E+08 | KLRC4-KLRK1 | 301 | ANXA1 |
| 1645 | AKR1C1 | 4513 | COX2 | 54796 | BNC2 | 302 | ANXA2 |
| 1646 | AKR1C2 | 5290 | PIK3CA | 23705 | CADM1 | 690 | BTF3P11 |
| 3065 | HDAC1 | 2592 | GALT | 57381 | RHOJ | 727 | C5 |
| 2908 | NR3C1 | 3240 | HP | 1.01E+08 | PGR-AS1 | 735 | C9 |
| 7042 | TGFB2 | 1312 | COMT | 23462 | HEY1 | 1072 | CFL1 |
| 4057 | LTF | 27306 | HPGDS | 7852 | CXCR4 | 1182 | CLCN3 |
| 3371 | TNC | 3606 | IL18 | 1.05E+08 | LINC02210-CRHR1 | 1234 | CCR5 |
| 10562 | OLFM4 | 412 | STS | 23604 | DAPK2 | 1237 | CCR8 |
| 5069 | PAPPA | 7099 | TLR4 | 57167 | SALL4 | 1277 | COL1A1 |
| 8648 | NCOA1 | 4312 | MMP1 | 56729 | RETN | 1365 | CLDN3 |
| 6876 | TAGLN | 3383 | ICAM1 | 7849 | PAX8 | 1382 | CRABP2 |
| 10628 | TXNIP | 2492 | FSHR | 7764 | ZNF217 | 1385 | CREB1 |
| 4318 | MMP9 | 999 | CDH1 | 84171 | LOXL4 | 1395 | CRHR2 |
| 4129 | MAOB | 4314 | MMP3 | 84061 | MAGT1 | 1400 | CRMP1 |
| 1675 | CFD | 1586 | CYP17A1 | 693120 | MIR33B | 1436 | CSF1R |
| 1462 | VCAN | 5047 | PAEP | 728378 | POTEF | 1490 | CTGF |
| 11067 | DEPP1 | 2946 | GSTM2 | 8562 | DENR | 1050 | CEBPA |
| 25802 | LMOD1 | 3458 | IFNG | 23236 | PLCB1 | 1044 | CDX1 |
| 3912 | LAMB1 | 10 | NAT2 | 63826 | SRR | 1033 | CDKN3 |
| 22943 | DKK1 | 5054 | SERPINE1 | 8549 | LGR5 | 760 | CA2 |
| 4128 | MAOA | 2950 | GSTP1 | 63027 | SLC22A23 | 800 | CALD1 |
| 4070 | TACSTD2 | 7057 | THBS1 | 25945 | NECTIN3 | 847 | CAT |
| 23327 | NEDD4L | 345275 | HSD17B13 | 23566 | LPAR3 | 890 | CCNA2 |
| 1528 | CYB5A | 1499 | CTNNB1 | 23245 | ASTN2 | 891 | CCNB1 |
| 23421 | ITGB3BP | 4846 | NOS3 | 8433 | UTF1 | 931 | MS4A1 |
| 23054 | NCOA6 | 10855 | HPSE | 85480 | TSLP | 961 | CD47 |
| 1592 | CYP26A1 | 3135 | HLA-G | 84941 | HSH2D | 983 | CDK1 |
| 4306 | NR3C2 | 3123 | HLA-DRB1 | 84000 | TMPRSS13 | 990 | CDC6 |
| 4313 | MMP2 | 7077 | TIMP2 | 8431 | NR0B2 | 998 | CDC42 |
| 23428 | SLC7A8 | 26191 | PTPN22 | 7534 | YWHAZ | 1013 | CDH15 |
| 1604 | CD55 | 1557 | CYP2C19 | 406937 | MIR145 | 1021 | CDK6 |
| 1734 | DIO2 | 7133 | TNFRSF1B | 81607 | NECTIN4 | 1493 | CTLA4 |
| 79822 | ARHGAP28 | 2247 | FGF2 | 10298 | PAK4 | 3623 | INHA |
| 3549 | IHH | 595 | CCND1 | 10288 | LILRB2 | 5541 | PR@ |
| 3516 | RBPJ | 5468 | PPARG | 10803 | CCR9 | 6358 | CCL14 |
| 3489 | IGFBP6 | 50943 | FOXP3 | 27242 | TNFRSF21 | 6361 | CCL17 |
| 79625 | NDNF | 3557 | IL1RN | 80312 | TET1 | 6366 | CCL21 |
| 2289 | FKBP5 | 6046 | BRD2 | 80309 | SPHKAP | 6370 | CCL25 |
| 3459 | IFNGR1 | 3565 | IL4 | 130367 | SGPP2 | 6376 | CX3CL1 |
| 2327 | FMO2 | 5894 | RAF1 | 10209 | EIF1 | 6382 | SDC1 |
| 56172 | ANKH | 207 | AKT1 | 132625 | ZFP42 | 6422 | SFRP1 |
| 3434 | IFIT1 | 7015 | TERT | 10859 | LILRB1 | 6424 | SFRP4 |
| 51191 | HERC5 | 1027 | CDKN1B | 27178 | IL37 | 6464 | SHC1 |
| 54206 | ERRFI1 | 1432 | MAPK14 | 10151 | HNRNPA3P1 | 6513 | SLC2A1 |
| 3164 | NR4A1 | 1435 | CSF1 | 10891 | PPARGC1A | 6515 | SLC2A3 |
| 55959 | SULF2 | 968 | CD68 | 133482 | SLCO6A1 | 6517 | SLC2A4 |
| 2200 | FBN1 | 1230 | CCR1 | 27022 | FOXD3 | 6346 | CCL1 |
| 2192 | FBLN1 | 7349 | UCN | 81631 | MAP1LC3B | 6295 | SAG |
| 81501 | DCSTAMP | 7965 | AIMP2 | 10413 | YAP1 | 6277 | S100A6 |
| 25840 | METTL7A | 7430 | EZR | 113026 | PLCD3 | 5599 | MAPK8 |
| 25890 | ABI3BP | 6387 | CXCL12 | 114131 | UCN3 | 5604 | MAP2K1 |
| 3696 | ITGB8 | 3953 | LEPR | 112476 | PRRT2 | 5609 | MAP2K7 |
| 3673 | ITGA2 | 5294 | PIK3CG | 10551 | AGR2 | 5715 | PSMD9 |
| 1839 | HBEGF | 1398 | CRK | 10534 | SSSCA1 | 5764 | PTN |
| 1843 | DUSP1 | 5291 | PIK3CB | 28952 | CCDC22 | 5817 | PVR |
| 27063 | ANKRD1 | 574411 | MIR451A | 81539 | SLC38A1 | 5818 | NECTIN1 |
| 3613 | IMPA2 | 10519 | CIB1 | 10512 | SEMA3C | 5925 | RB1 |
| 1994 | ELAVL1 | 285 | ANGPT2 | 81617 | CAB39L | 5947 | RBP1 |
| 29079 | MED4 | 5328 | PLAU | 10498 | CARM1 | 6060 | RNU1-4 |
| 29116 | MYLIP | 9402 | GRAP2 | 81537 | SGPP1 | 6093 | ROCK1 |
| 3586 | IL10 | 10598 | AHSA1 | 80781 | COL18A1 | 6275 | S100A4 |
| 30061 | SLC40A1 | 1029 | CDKN2A | 10671 | DCTN6 | 6532 | SLC6A4 |
| 2063 | NR2F6 | 5340 | PLG | 10673 | TNFSF13B | 6586 | SLIT3 |
| 2878 | GPX3 | 6783 | SULT1E1 | 30816 | ERVW-1 | 6590 | SLPI |
| 10924 | SMPDL3A | 6774 | STAT3 | 140828 | LINC00261 | 7076 | TIMP1 |
| 1655 | DDX5 | 4790 | NFKB1 | 10911 | UTS2 | 7098 | TLR3 |
| 374 | AREG | 6770 | STAR | 9575 | CLOCK | 7130 | TNFAIP6 |
| 9219 | MTA2 | 1392 | CRH | 406886 | MIRLET7D | 7178 | TPT1 |
| 9282 | MED14 | 9536 | PTGES | 406903 | MIR10B | 7216 | TRO |
| 6505 | SLC1A1 | 682 | BSG | 9573 | GDF3 | 7295 | TXN |
| 9318 | COPS2 | 1636 | ACE | 406906 | MIR122 | 7392 | USF2 |
| 6414 | SELENOP | 3627 | CXCL10 | 65125 | WNK1 | 7402 | UTRN |
| 9440 | MED17 | 25897 | RNF19A | 9469 | CHST3 | 7421 | VDR |
| 655 | BMP7 | 80316 | PPP1R2C | 11280 | SCN11A | 7442 | TRPV1 |
| 9611 | NCOR1 | 3685 | ITGAV | 406913 | MIR126 | 7448 | VTN |
| 389558 | FAM180A | 26073 | POLDIP2 | 64689 | GORASP1 | 7468 | NSD2 |
| 715 | C1R | 2308 | FOXO1 | 64421 | DCLRE1C | 7045 | TGFBI |
| 6096 | RORB | 3091 | HIF1A | 11331 | PHB2 | 7044 | LEFTY2 |
| 9953 | HS3ST3B1 | 57491 | AHRR | 26585 | GREM1 | 7041 | TGFB1I1 |
| 387496 | RASL11A | 2048 | EPHB2 | 9360 | PPIG | 6623 | SNCG |
| 5999 | RGS4 | 5293 | PIK3CD | 406933 | MIR141 | 6657 | SOX2 |
| 9134 | CCNE2 | 3491 | CYR61 | 11214 | AKAP13 | 6714 | SRC |
| 9120 | SLC16A6 | 137529 | CKS1BP7 | 79154 | DHRS11 | 6778 | STAT6 |
| 7422 | VEGFA | 1001 | CDH3 | 200424 | TET3 | 6855 | SYP |
| 59 | ACTA2 | 3486 | IGFBP3 | 79612 | NAA16 | 6857 | SYT1 |
| 8404 | SPARCL1 | 2263 | FGFR2 | 10059 | DNM1L | 6869 | TACR1 |
| 7200 | TRH | 960 | CD44 | 10058 | ABCB6 | 6928 | HNF1B |
| 7182 | NR2C2 | 948 | CD36 | 353376 | TICAM2 | 6929 | TCF3 |
| 7181 | NR2C1 | 5970 | RELA | 373156 | GSTK1 | 6997 | TDGF1 |
| 7124 | TNF | 6037 | RNASE3 | 51014 | TMED7 | 7010 | TEK |
| 7067 | THRA | 5058 | PAK1 | 10963 | STIP1 | 7013 | TERF1 |
| 8614 | STC2 | 5595 | MAPK3 | 387332 | TBPL2 | 7490 | WT1 |
| 8801 | SUCLG2 | 5111 | PCNA | 90993 | CREB3L1 | 5530 | PPP3CA |
| 8829 | NRP1 | 115352 | FCRL3 | 51182 | HSPA14 | 3624 | INHBA |
| 9076 | CLDN1 | 5228 | PGF | 388585 | HES5 | 3960 | LGALS4 |
| 6716 | SRD5A2 | 1163 | CKS1B | 9790 | BMS1 | 3965 | LGALS9 |
| 6715 | SRD5A1 | 3577 | CXCR1 | 11162 | NUDT6 | 3972 | LHB |
| 9112 | MTA1 | 10468 | FST | 9770 | RASSF2 | 4018 | LPA |
| 9975 | NR1D2 | 2833 | CXCR3 | 83716 | CRISPLD2 | 4049 | LTA |
| 10025 | MED16 | 3560 | IL2RB | 7518 | XRCC4 | 4068 | SH2D1A |
| 1268 | CNR1 | 1030 | CDKN2B | 1545 | CYP1B1 | 4087 | SMAD2 |
| 4741 | NEFM | 3556 | IL1RAP | 2149 | F2R | 4088 | SMAD3 |
| 10125 | RASGRP1 | 5460 | POU5F1 | 2150 | F2RL1 | 4133 | MAP2 |
| 1368 | CPM | 5465 | PPARA | 2152 | F3 | 4233 | MET |
| 121601 | ANO4 | 2246 | FGF1 | 2237 | FEN1 | 4254 | KITLG |
| 10140 | TOB1 | 718 | C3 | 2243 | FGA | 4311 | MME |
| 5469 | MED1 | 3308 | HSPA4 | 2254 | FGF9 | 3956 | LGALS1 |
| 6574 | SLC20A1 | 406884 | MIRLET7B | 2288 | FKBP4 | 3897 | L1CAM |
| 5167 | ENPP1 | 3159 | HMGA1 | 2321 | FLT1 | 3821 | KLRC1 |
| 10666 | CD226 | 268 | AMH | 2475 | MTOR | 3643 | INSR |
| 120892 | LRRK2 | 3146 | HMGB1 | 2488 | FSHB | 3669 | ISG20 |
| 5320 | PLA2G2A | 8462 | KLF11 | 2551 | GABPA | 3678 | ITGA5 |
| 4916 | NTRK3 | 729230 | CCR2 | 2624 | GATA2 | 3690 | ITGB3 |
| 116039 | OSR2 | 7132 | TNFRSF1A | 2147 | F2 | 3716 | JAK1 |
| 10154 | PLXNC1 | 197 | AHSG | 2113 | ETS1 | 3725 | JUN |
| 10060 | ABCC9 | 196 | AHR | 2064 | ERBB2 | 3802 | KIR2DL1 |
| 5732 | PTGER2 | 185 | AGTR1 | 1583 | CYP11A1 | 3804 | KIR2DL3 |
| 149111 | CNIH3 | 8091 | HMGA2 | 1634 | DCN | 3806 | KIR2DS1 |
| 10902 | BRD8 | 7412 | VCAM1 | 1728 | NQO1 | 3810 | KIR2DS5 |
| 5737 | PTGFR | 7424 | VEGFC | 1786 | DNMT1 | 3811 | KIR3DL1 |
| 3575 | IL7R | 284 | ANGPT1 | 1788 | DNMT3A | 3812 | KIR3DL2 |
| 10090 | UST | 2691 | GHRH | 1803 | DPP4 | 4321 | MMP12 |
| 5915 | RARB | 6374 | CXCL5 | 1804 | DPP6 | 4322 | MMP13 |
| 5618 | PRLR | 627 | BDNF | 1901 | S1PR1 | 4353 | MPO |
| 92304 | SCGB3A1 | 2638 | GC | 1978 | EIF4EBP1 | 4988 | OPRM1 |
| 6352 | CCL5 | 9370 | ADIPOQ | 2023 | ENO1 | 5154 | PDGFA |
| 596 | BCL2 | 6502 | SKP2 | 2056 | EPO | 5156 | PDGFRA |
| 3791 | KDR | 367 | AR | 2057 | EPOR | 5196 | PF4 |
| 332 | BIRC5 | 6648 | SOD2 | 2627 | GATA6 | 5197 | PF4V1 |
| 5176 | SERPINF1 | 406982 | MIR20A | 2692 | GHRHR | 5245 | PHB |
| 581 | BAX | 6696 | SPP1 | 1364 | CLDN4 | 3732 | CD82 |
| 1958 | EGR1 | 356 | FASLG | 3291 | HSD11B2 | 5332 | PLCB4 |
| 4067 | LYN | 2688 | GH1 | 3293 | HSD17B3 | 5347 | PLK1 |
| 861 | RUNX1 | 6863 | TAC1 | 3329 | HSPD1 | 5424 | POLD1 |
| 4792 | NFKBIA | 7476 | WNT7A | 3375 | IAPP | 5426 | POLE |
| 6402 | SELL | 2018 | EMX2 | 3426 | CFI | 5444 | PON1 |
| 598 | BCL2L1 | 4851 | NOTCH1 | 3429 | IFI27 | 4914 | NTRK1 |
| 6356 | CCL11 | 4485 | MST1 | 3490 | IGFBP7 | 4909 | NTF4 |
| 7409 | VAV1 | 1950 | EGF | 3558 | IL2 | 4908 | NTF3 |
| 2099 | ESR1 | 7515 | XRCC1 | 3579 | CXCR2 | 4360 | MRC1 |
| 54361 | WNT4 | 2697 | GJA1 | 3589 | IL11 | 4440 | MSI1 |
| 55591 | VEZT | 84432 | PROK1 | 3594 | IL12RB1 | 4477 | MSMB |
| 2335 | FN1 | 1844 | DUSP2 | 3596 | IL13 | 4486 | MST1R |
| 3480 | IGF1R | 1437 | CSF2 | 3284 | HSD3B2 | 4585 | MUC4 |
| 4216 | MAP3K4 | 4323 | MMP14 | 3283 | HSD3B1 | 4684 | NCAM1 |
| 7040 | TGFB1 | 4915 | NTRK2 | 3248 | HPGD | 4780 | NFE2L2 |
| 3553 | IL1B | 4192 | MDK | 2706 | GJB2 | 4830 | NME1 |
| 8289 | ARID1A | 3603 | IL16 | 2798 | GNRHR | 4842 | NOS1 |
| 3569 | IL6 | 22882 | ZHX2 | 2852 | GPER1 | 4843 | NOS2 |
| 10319 | LAMC3 | 1789 | DNMT3B | 2919 | CXCL1 | 4855 | NOTCH4 |
| 3576 | CXCL8 | 4292 | MLH1 | 2923 | PDIA3 | 4885 | NPTX2 |
| 6347 | CCL2 | 4316 | MMP7 | 2956 | MSH6 | 5518 | PPP2R1A |
| 3973 | LHCGR | 1269 | CNR2 | 3455 | IFNAR2 | 5742 | PTGS1 |
| 5025 | P2RX4 |  |  |  |  |  |  |

**Table S4. The core targets of CALG in the treatment of endometriosis**

| Name | Degree | Name | Degree | Name | Degree | Name | Degree |
| --- | --- | --- | --- | --- | --- | --- | --- |
| CDK1 | 8 | NCOA1 | 17 | CDC42 | 16 | CXCR4 | 20 |
| PLAU | 8 | AR | 14 | HDAC1 | 19 | IFNG | 9 |
| JUN | 35 | NFKBIA | 13 | SMAD3 | 19 | CNR1 | 15 |
| FOS | 24 | NFKB1 | 23 | CXCR1 | 16 | LYN | 19 |
| VEGFA | 30 | MAPK8 | 26 | HMGB1 | 8 | MMP3 | 8 |
| TP53 | 31 | NR3C1 | 21 | MAPK3 | 40 | IGFBP3 | 8 |
| AKT1 | 30 | STAT3 | 45 | IL1B | 14 | PGR | 10 |
| IGF1R | 12 | ARNT | 7 | ERBB2 | 12 | PDGFRA | 9 |
| CCND1 | 17 | NCOR1 | 13 | FN1 | 20 | PTGS2 | 9 |
| MTOR | 11 | PPARG | 12 | ITGAV | 16 | CYP19A1 | 5 |
| RAF1 | 12 | FGF2 | 15 | HDAC2 | 12 | AGTR1 | 7 |
| PCNA | 7 | PLG | 11 | AKR1C3 | 4 | CYP17A1 | 4 |
| CDK6 | 8 | RUNX1 | 9 | PIK3CB | 15 | S1PR1 | 23 |
| RELA | 26 | F2R | 6 | CXCL1 | 19 | HSD17B2 | 4 |
| CCNA2 | 5 | F2 | 15 | OPRM1 | 18 | MMP2 | 9 |
| KDR | 10 | SRC | 42 | ITGB1 | 14 | CNR2 | 15 |
| TNF | 20 | CXCR2 | 15 | ESR2 | 8 | MET | 10 |
| CTNNB1 | 21 | CXCL8 | 28 | PPARA | 12 | CCR5 | 18 |
| PIK3CA | 41 | JAK1 | 16 | TERT | 11 | CYP2B6 | 2 |
| SERPINE1 | 10 | RARB | 7 | NOS2 | 10 | TEK | 12 |
| MAPK1 | 39 | ESR1 | 28 | IL2 | 18 | CCR2 | 16 |
| HIF1A | 13 | CYP1A1 | 9 | MMP9 | 13 | MMP1 | 7 |
| ICAM1 | 5 | BCL2 | 9 | ALB | 8 | CXCR3 | 15 |
| FGFR2 | 8 | MAPK14 | 26 | STAT6 | 22 | CCR1 | 16 |
| EGFR | 25 | TGFB1 | 19 | CARM1 | 10 | AGTR2 | 19 |
| MAP2K1 | 15 | SMAD2 | 8 | DRD2 | 15 | CCR8 | 15 |

**Table S5. Top 15 of metabolic pathways**

| NO. | KEGG_ID | Name | Pathway Class | Degree |
| --- | --- | --- | --- | --- |
| 1 | hsa05200 | Pathways in cancer | Cancer: overview | 53 |
| 2 | hsa05205 | Proteoglycans in cancer | Cancer: overview | 32 |
| 3 | hsa04151 | PI3K-Akt signaling pathway | Signal transduction | 29 |
| 4 | hsa05161 | Hepatitis B | Infectious disease: viral | 27 |
| 5 | hsa04062 | Chemokine signaling pathway | Immune system | 24 |
| 6 | hsa04510 | Focal adhesion | Cellular community - eukaryotes | 24 |
| 7 | hsa04015 | Rap1 signaling pathway | Signal transduction | 24 |
| 8 | hsa05212 | Pancreatic cancer | Cancer: specific types | 22 |
| 9 | hsa05142 | Chagas disease  (American trypanosomiasis) | Infectious disease: parasitic | 22 |
| 10 | hsa05203 | Viral carcinogenesis | Cancer: overview | 22 |
| 11 | hsa05215 | Prostate cancer | Cancer: specific types | 21 |
| 12 | hsa04066 | HIF-1 signaling pathway | Signal transduction | 21 |
| 13 | hsa05166 | HTLV-I infection | Infectious disease: viral | 21 |
| 14 | hsa04668 | TNF signaling pathway | Signal transduction | 20 |
| 15 | hsa04014 | Ras signaling pathway | Signal transduction | 20 |
